# Supplementary material
Source: PubMed Central journal article supplement (PMC2040881)

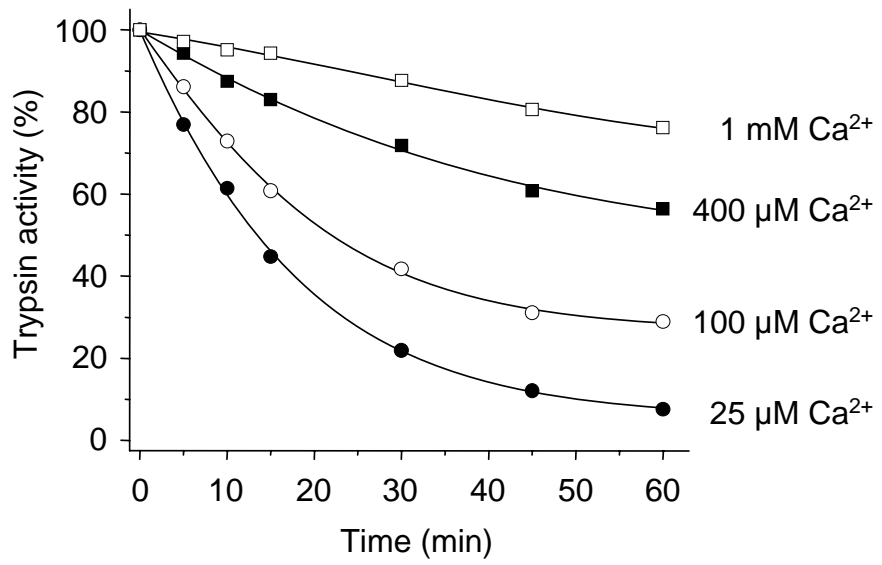

Supplement: pnas_0703714104_1.pdf [file pnas_0703714104_1.pdf]

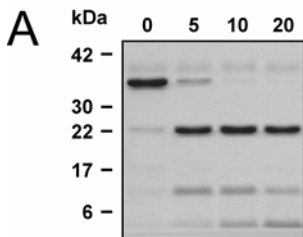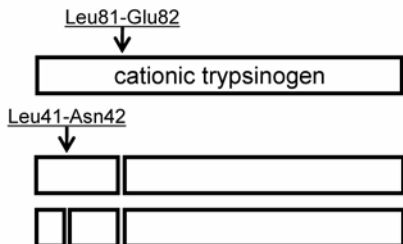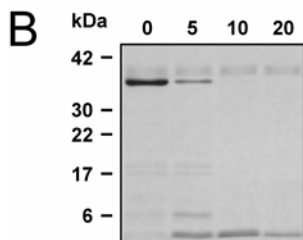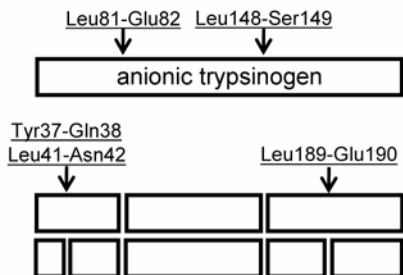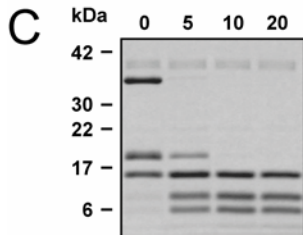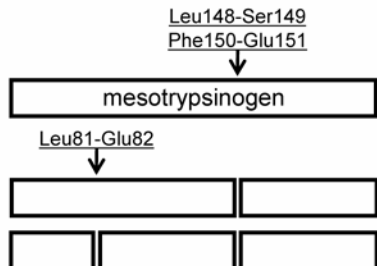

Supplement: pnas_0703714104_2.pdf [file pnas_0703714104_2.pdf]
